# Supplementary material for: A Participatory Systems Inquiry into Land Use Planning in Regional Victoria: Insights from Causal Loop Diagramming
Source: Research Square preprint supplement (doi:10.21203/rs.3.rs-6737664/v1), 2025-06-03

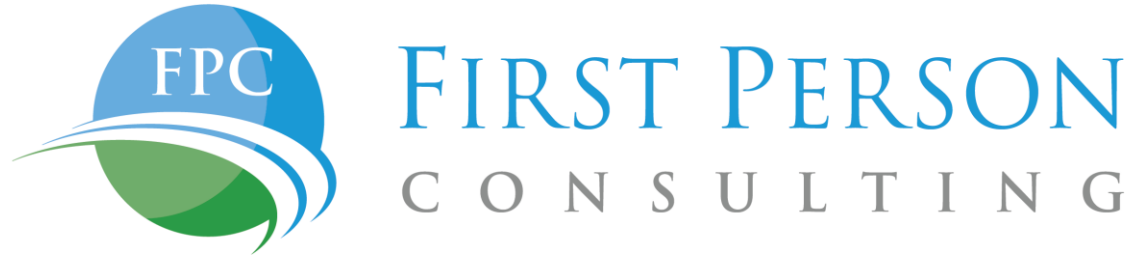

# Think Tank: Land-use decision making in an increasingly complex world

Making Sense with Systems

---

MATT HEALEY | [MATT@FPCCONSULTING.COM.AU](mailto:MATT@FPCCONSULTING.COM.AU)

# Structure for the day

---

- Introductions
- Background to the workshop
- Introduction to systems thinking
- Developing causal loop diagrams
- Discuss. Then discuss some more.
- Review. Reflect. Evaluate.

# Introductions

---

- Who are you?
- Which organisation are you from?
- What's your connection / role / relationship to land use decision making?

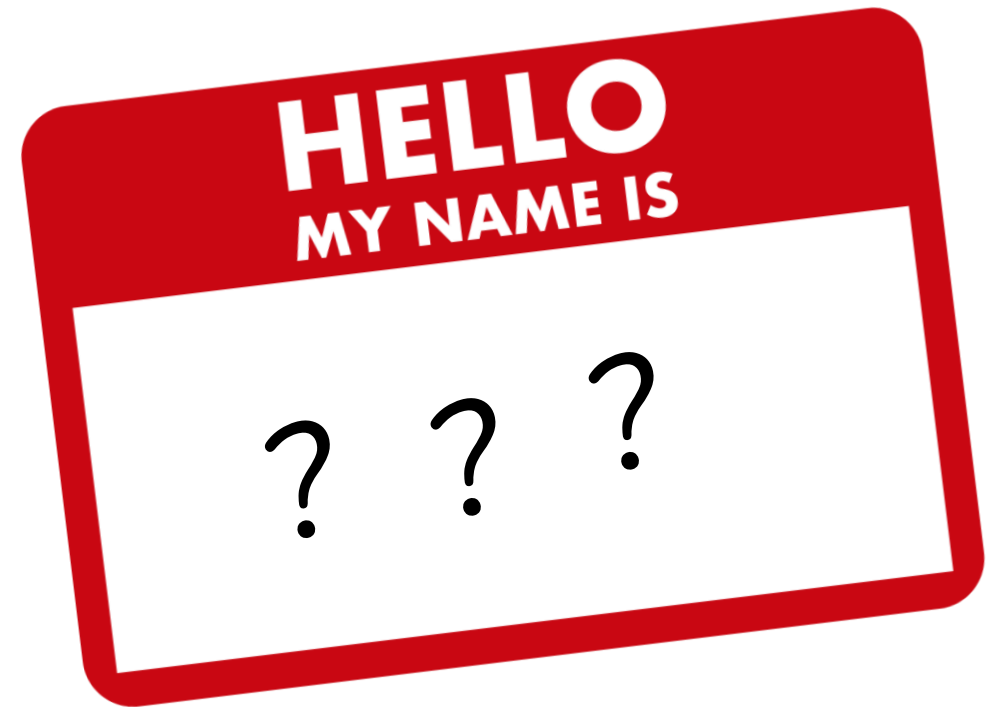

# Context setting

---

# Introduction to systems thinking

---

- **Systems thinking** is an approach to understanding and solving complex problems by **framing** them as interconnected and interdependent networks of factors, rather than isolated components.
- To view something as a 'system', in essence we are:
  - Looking at something holistically, rather than individual parts
  - Focus on the nature of relationships / connections, and what they mean within the broader context
  - Appreciate that they are shifting / dynamic
  - Are subject to a range of factors at different levels
  - Produce outcomes / changes / that can be greater than the sum of their parts

# So, what is systems thinking?

---

| Traditional Analysis                                                                                                                                                                                              | Systems Thinking                                                                                                                                                                                                   |
|-------------------------------------------------------------------------------------------------------------------------------------------------------------------------------------------------------------------|--------------------------------------------------------------------------------------------------------------------------------------------------------------------------------------------------------------------|
| <p>Traditional analysis focuses on the <b>separating the individual pieces</b> of what is being studied; in fact, the word “analysis” actually comes from the root meaning “to break into constituent parts.”</p> | <p>Systems thinking, in contrast, focuses on how the thing being studied <b>interacts with the other constituents</b> of the system—a set of elements that interact to produce behavior—of which it is a part.</p> |

# Why do we do it?

- **Situation / problem framing** – it allows for us to contextualise problems within a broader system or network of determinants
- **Direction setting** – it supports facilitated processes for deciding where to intervene, and what the potential results will be.

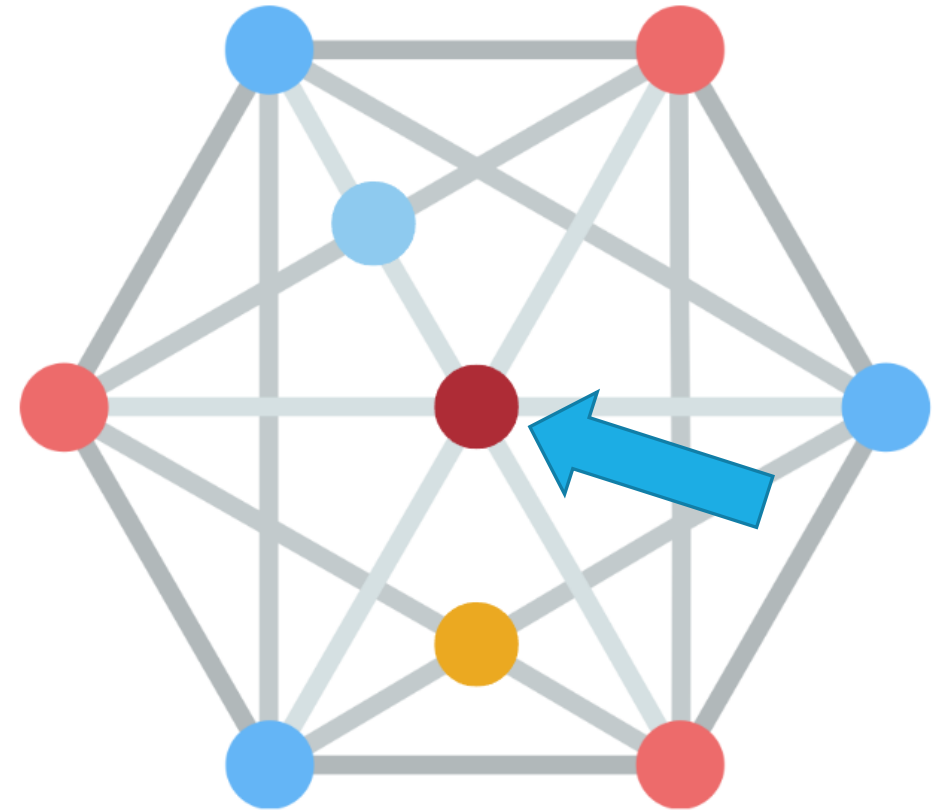

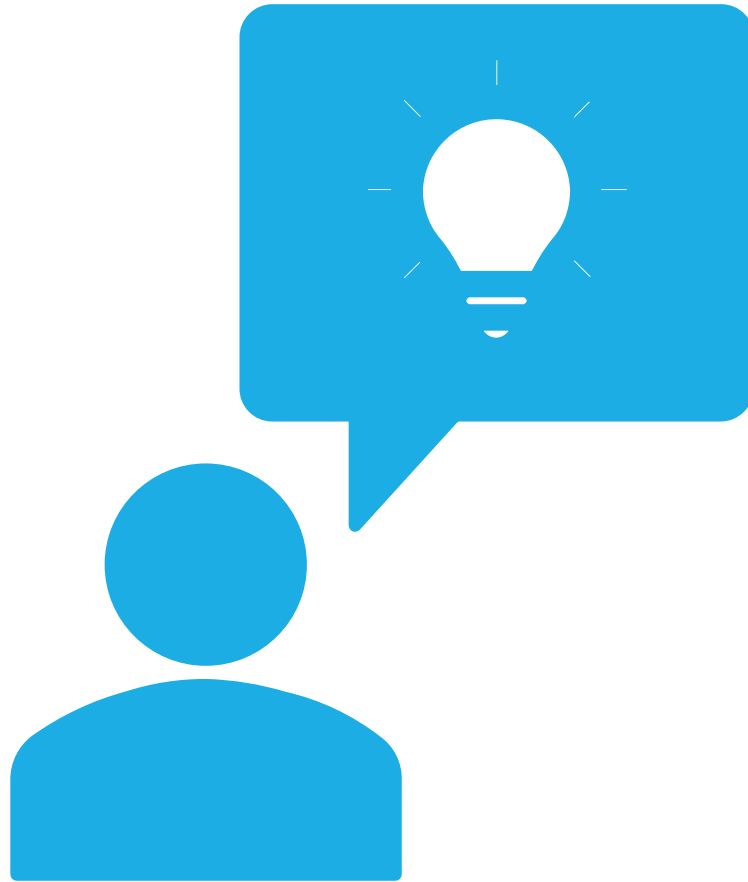

How do  
we 'do'  
systems  
thinking?

---



# Requirements for 'doing'

---

There are a number of techniques that you can use, but all typically start with:

- **Boundary setting** – that is, what is the area or topic of focus? What dictates the factors that are 'in' or 'out' of the system?
- **Stakeholder involvement** – deciding on and bringing together different perspectives of the 'system' that you are trying to make sense of?
- **Applying mapping techniques** – these can depend on your situation, but can include (among others):
  - Causal Loop Diagrams
  - Cognitive Mind Mapping
  - Social Network Analysis

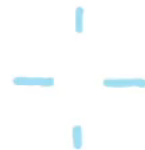

# Activity 1: Modelling our own system

---

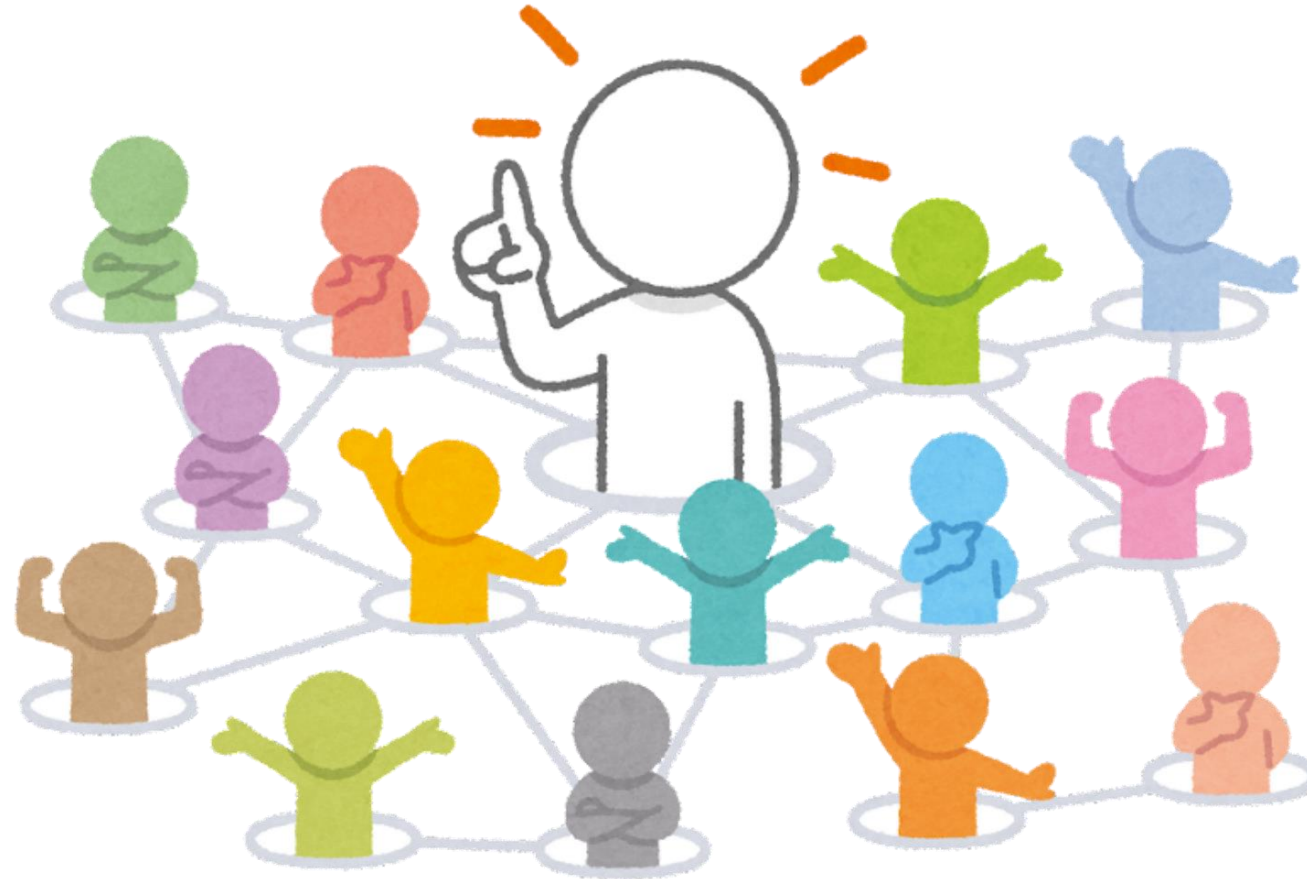

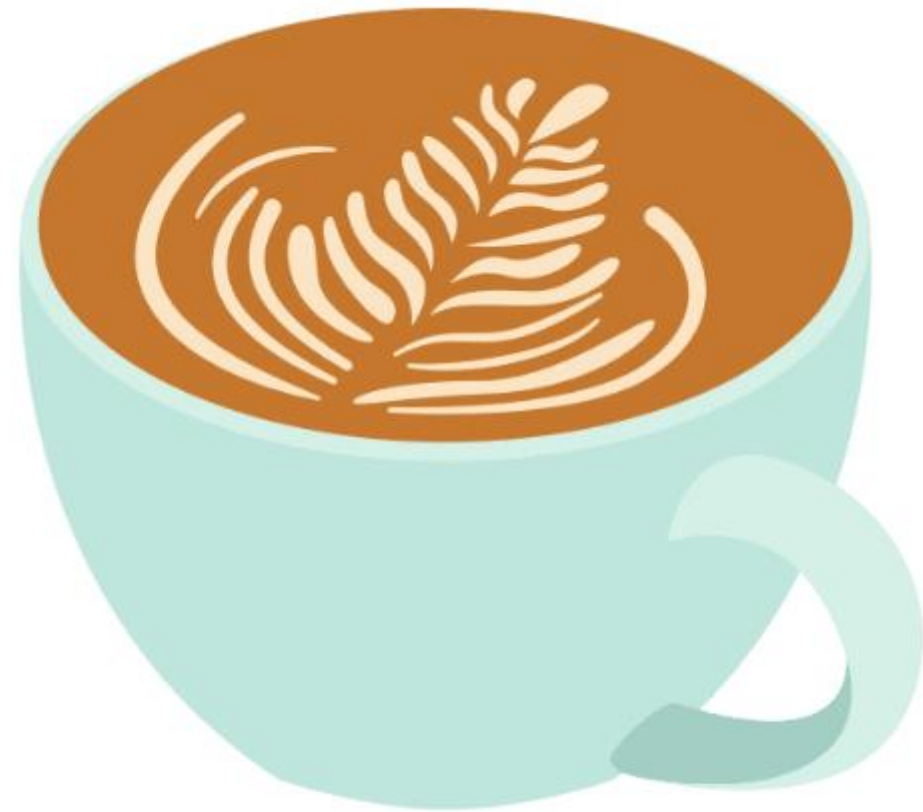

# Causal Loop Diagrams (CLDs)

- A **causal loop diagram (CLD)** is a tool used to show how different parts of a system are connected and influence each other.
- It helps you understand the cause-and-effect relationships within a system.
- We use to them to model / reflect our understanding in other parts.

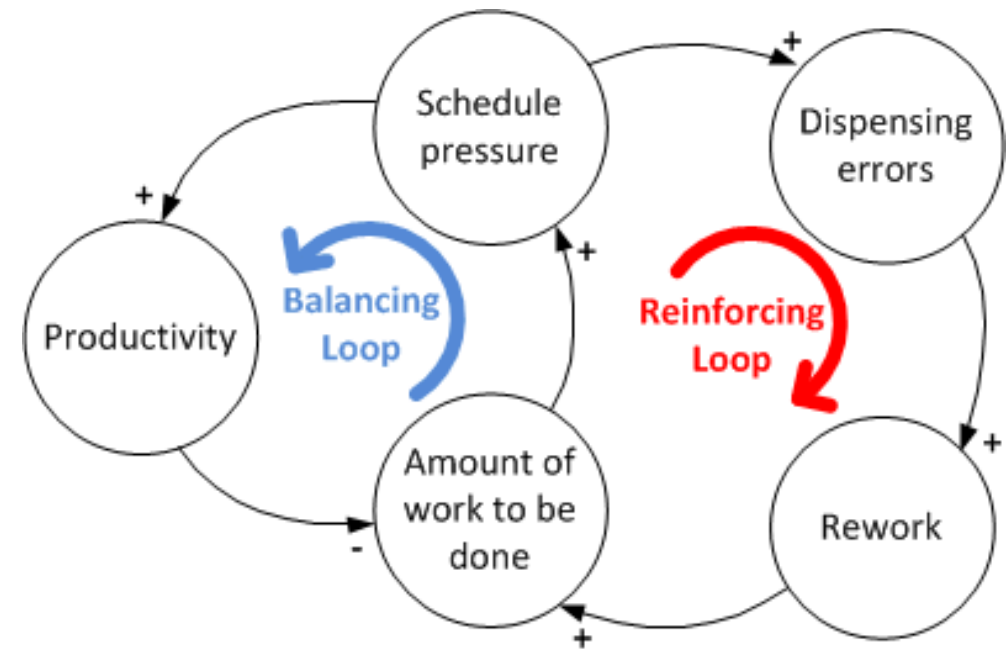

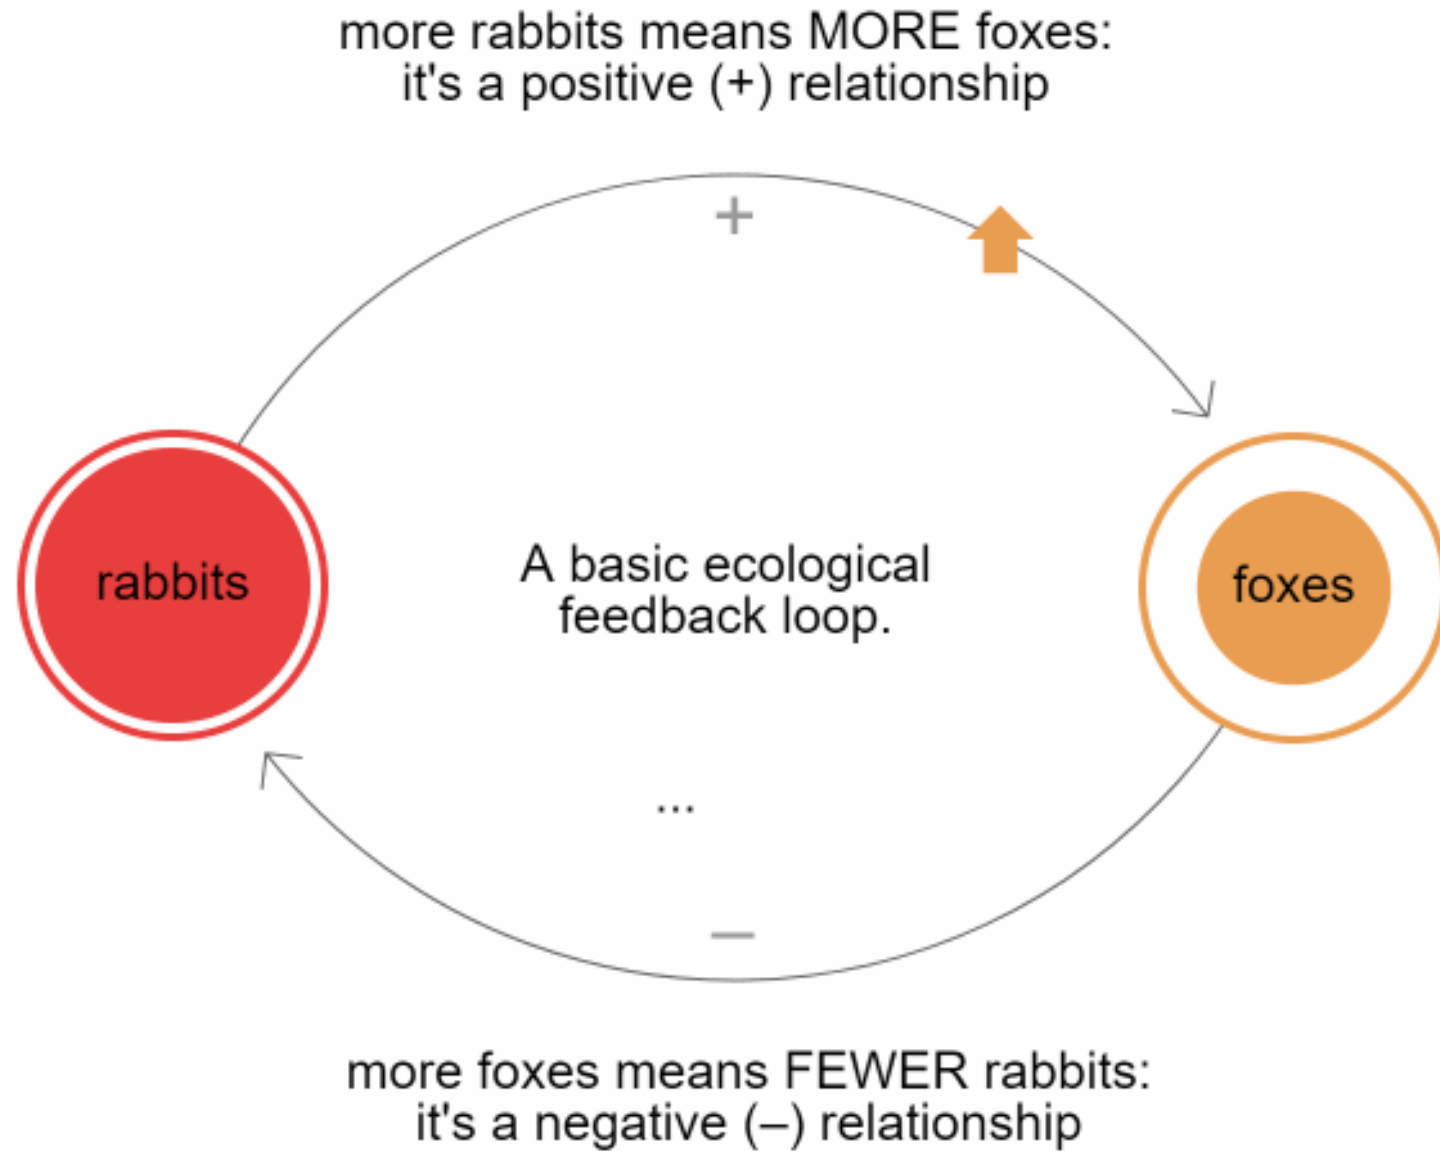

# Creating Causal Loop Models

---

They should be measurable / observable components of the system, rather than vague or abstract ideas.

Tips:

- **Specific:** They focus on particular, measurable aspects of the system.
- **Actionable:** They are things you can influence or observe directly.
- **Descriptive:** They clearly describe what part of the system they represent.
- **Neutral:** They are not overly positive or negative; they just describe a condition.

In summary:

- **Good variables** are specific (e.g., "crop yield"), measurable (e.g., "water usage per hectare"), and focus on one thing at a time.
- **Bad variables** are vague (e.g., "success"), subjective (e.g., "good conditions"), or overly broad (e.g., "sustainability efforts").

# Starting your model

---

- Form groups of 5-6 people
- Aim for a mix of backgrounds / expertise if you can
- This will be your group for the rest of the session

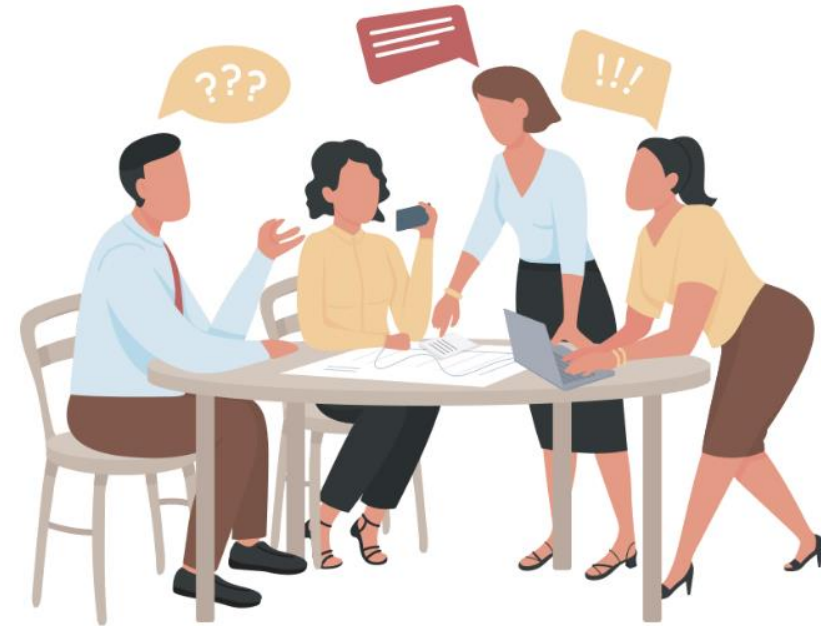



# Starting your model

---

- Grab a piece of butchers paper
- Your goal:

**Develop a draft Causal Loop Diagram that reflects the factors influencing regional land-use decision making in the context of increasing levels of complexity.**

- Write in the centre of your map “**Land-use decision making**”

1. Individually, think about the different factors that you see as influencing land-use planning / decision making (3-4 mins)
2. Share between you what you have come up with, and where you have common factors write them down on the page spaced out. Start with 10-12.
3. Draw lines connecting the variables. There should be a direct causal link between those variables.
4. Determine the nature of the connection (plus / minus)
5. Add, iterate, refine.
6. If you have a complete ‘loop’ consider if it is **balancing** or **reinforcing**



# Feedback / share

---

- An important part of the CLD development process is cross-pollination of ideas / thinking
- Each group to spend three minutes describing some of the dynamics at play, and anything you found / observed
- We will then return to the maps, and continue to add / refine

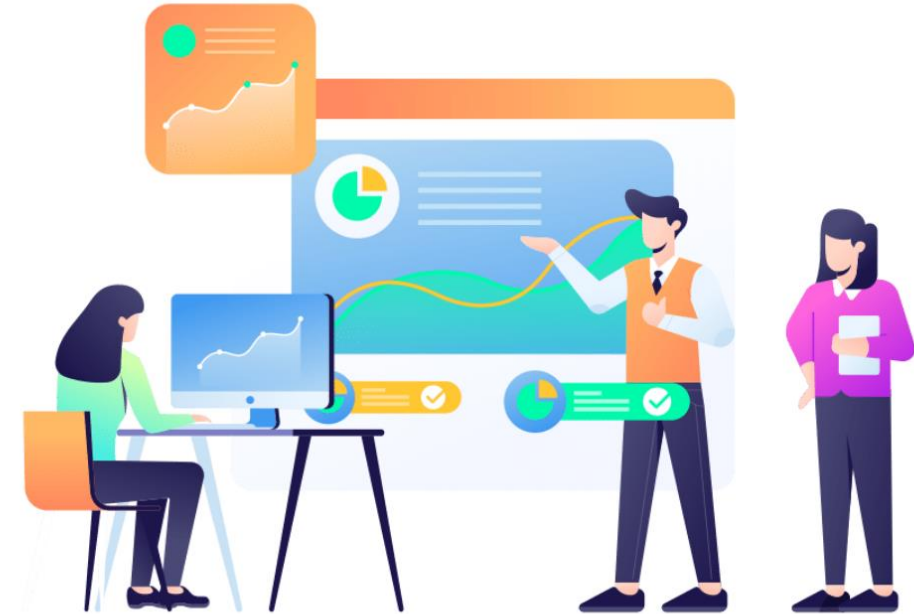

# Evaluation

---

Before you leave, please make sure to fill out the short evaluation on today!

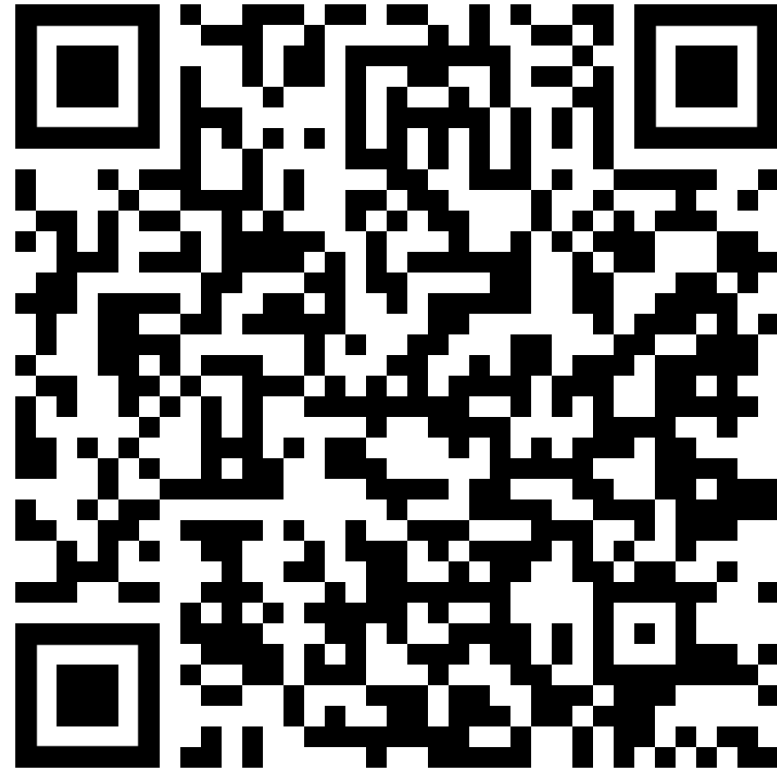

Supplement: Supplementary file 2 [file 3143e2257684d8c0b71bd3e1.pdf]
