# Supplementary material for: A Participatory Systems Inquiry into Land Use Planning in Regional Victoria: Insights from Causal Loop Diagramming
Source: Research Square preprint supplement (doi:10.21203/rs.3.rs-6737664/v1), 2025-06-03

# THINK TANK

## LAND USE DECISION MAKING IN AN INCREASINGLY COMPLEX WORLD

The City of Greater Bendigo and North Central Catchment Management Authority invite you to participate in a discussion group, to inform their collaborative PhD project with Deakin University.

*The PhD project has developed a series of interactive maps that illustrates how climate change scenarios impact commodities under different climate change scenarios. These maps serve as a vital tool for understanding the region's capacity to support various agricultural commodities under changing environmental conditions.*

*The second part of the PhD is to engage with decision makers in the region to understand how they use systems thinking principles to improve their decisions around land use in the region.*

**2:00 pm – 5:00 pm**  
**5th September 2024**

### LOCATION

LVL 3 RM 1  
GALKANGU-BENDIGO  
GOV HUB

### CONTACT INFORMATION

SALLY BEER | CITY OF GREATER BENDIGO  
MANDY COULSON | NORTH CENTRAL  
CATCHMENT MANAGEMENT AUTHORITY

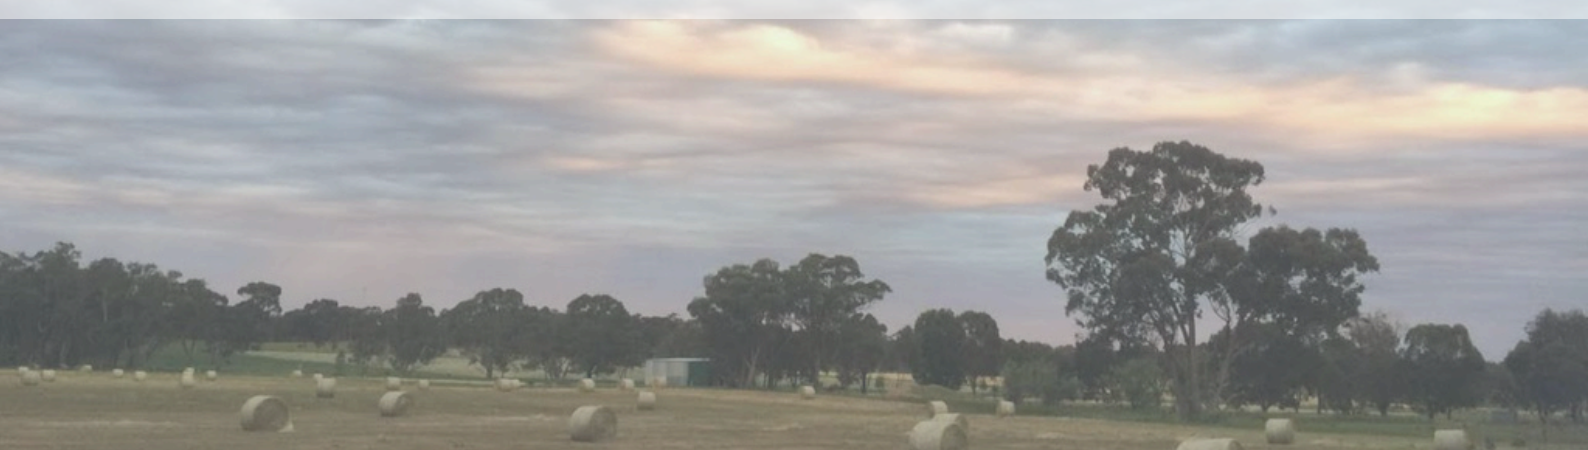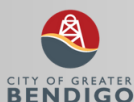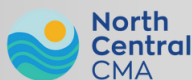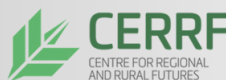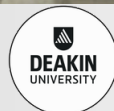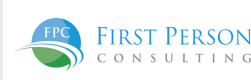

# WORKSHOP PURPOSE

- *Engage with the region's planning and land use experts regarding their current land use decision strategies.*
- *Identify and understand the pressure points impacting regional land use decision making as the climate continues to change.*
- *Explore the use of systems thinking to help organisation's in the North Central region to understand how climate change will impact land management, and to inform how they make decisions about land use.*
- *Support collaboration across sectors to solve a common problem across multiple organizations*
- *Assist multiple organisation's across the North Central region in their scenario planning under multiple future uncertainties.*

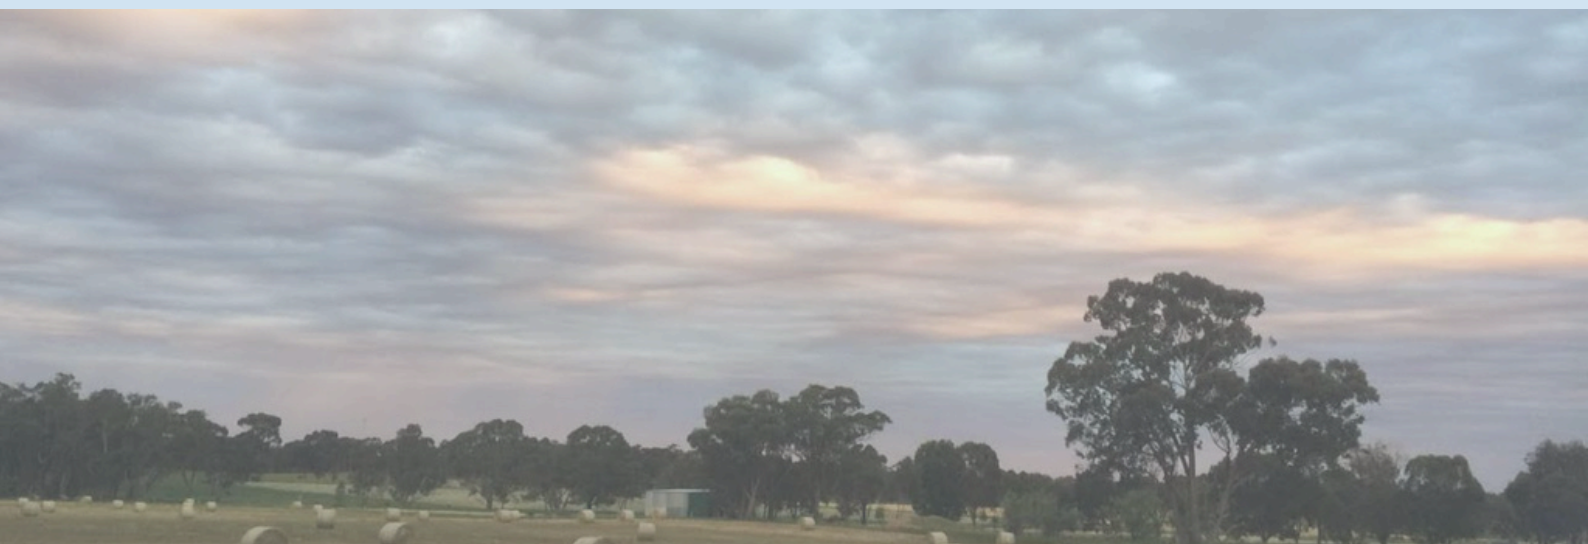

Supplement: Supplementary file 1 [file 271977c1eae4e4284fe1c894.pdf]
