# Supplementary material for: A Participatory Systems Inquiry into Land Use Planning in Regional Victoria: Insights from Causal Loop Diagramming
Source: Research Square preprint supplement (doi:10.21203/rs.3.rs-6737664/v1), 2025-06-03
Supplement: Supplementary file 1 [file e276b6129e9ff06e38544e59.docx]

**Hand-drawn Causal Loop Diagrams in the workshop by 4 working groups**


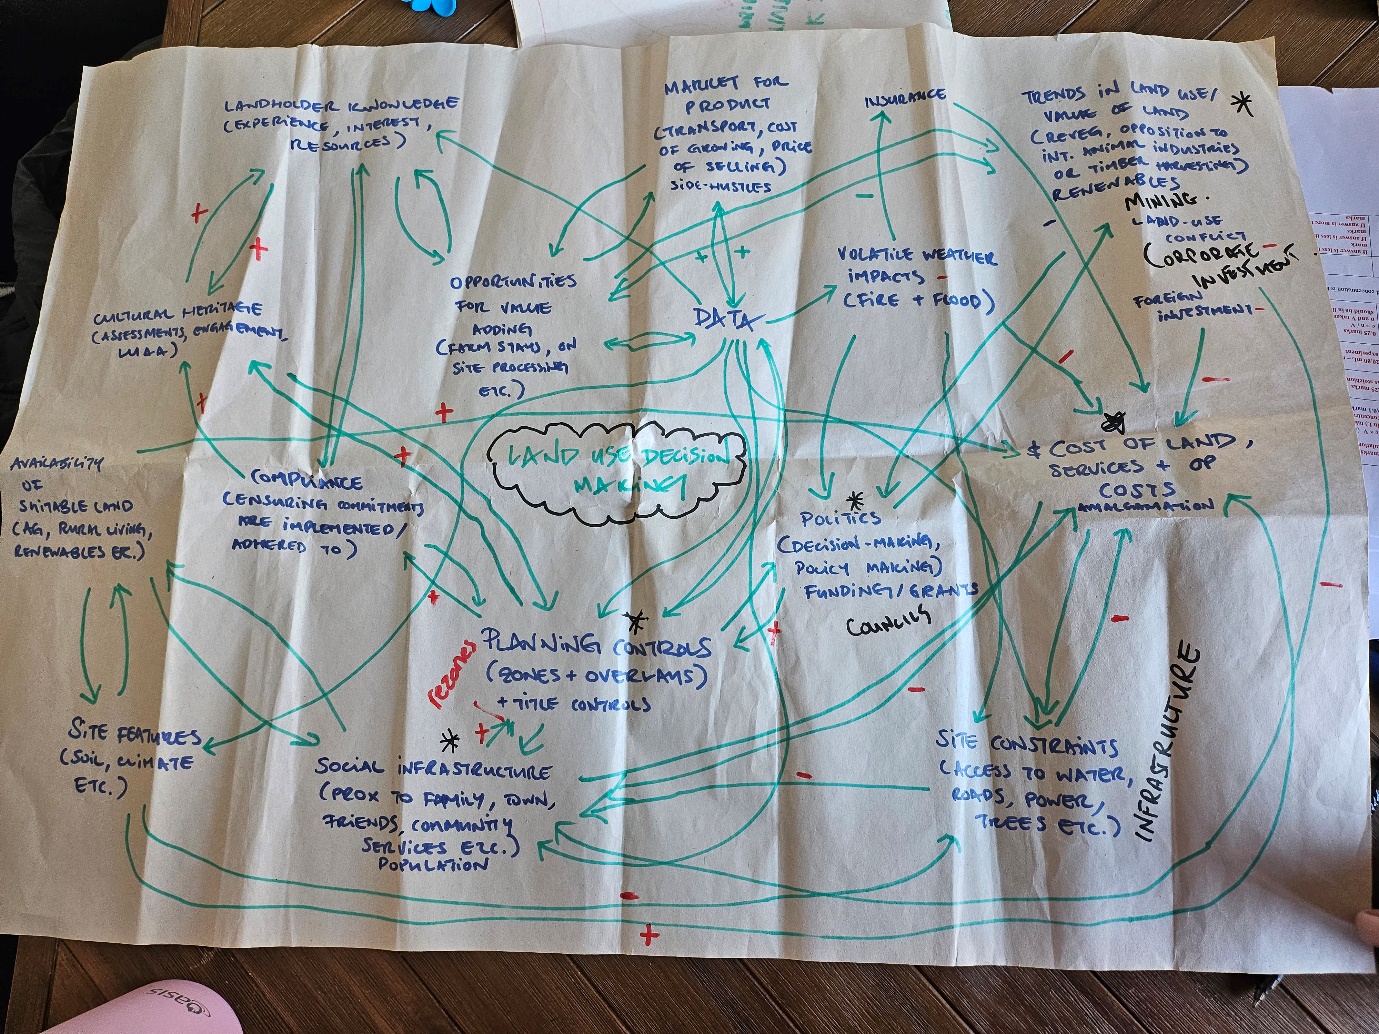


Figure 1: CLD 1- Workgroup 1


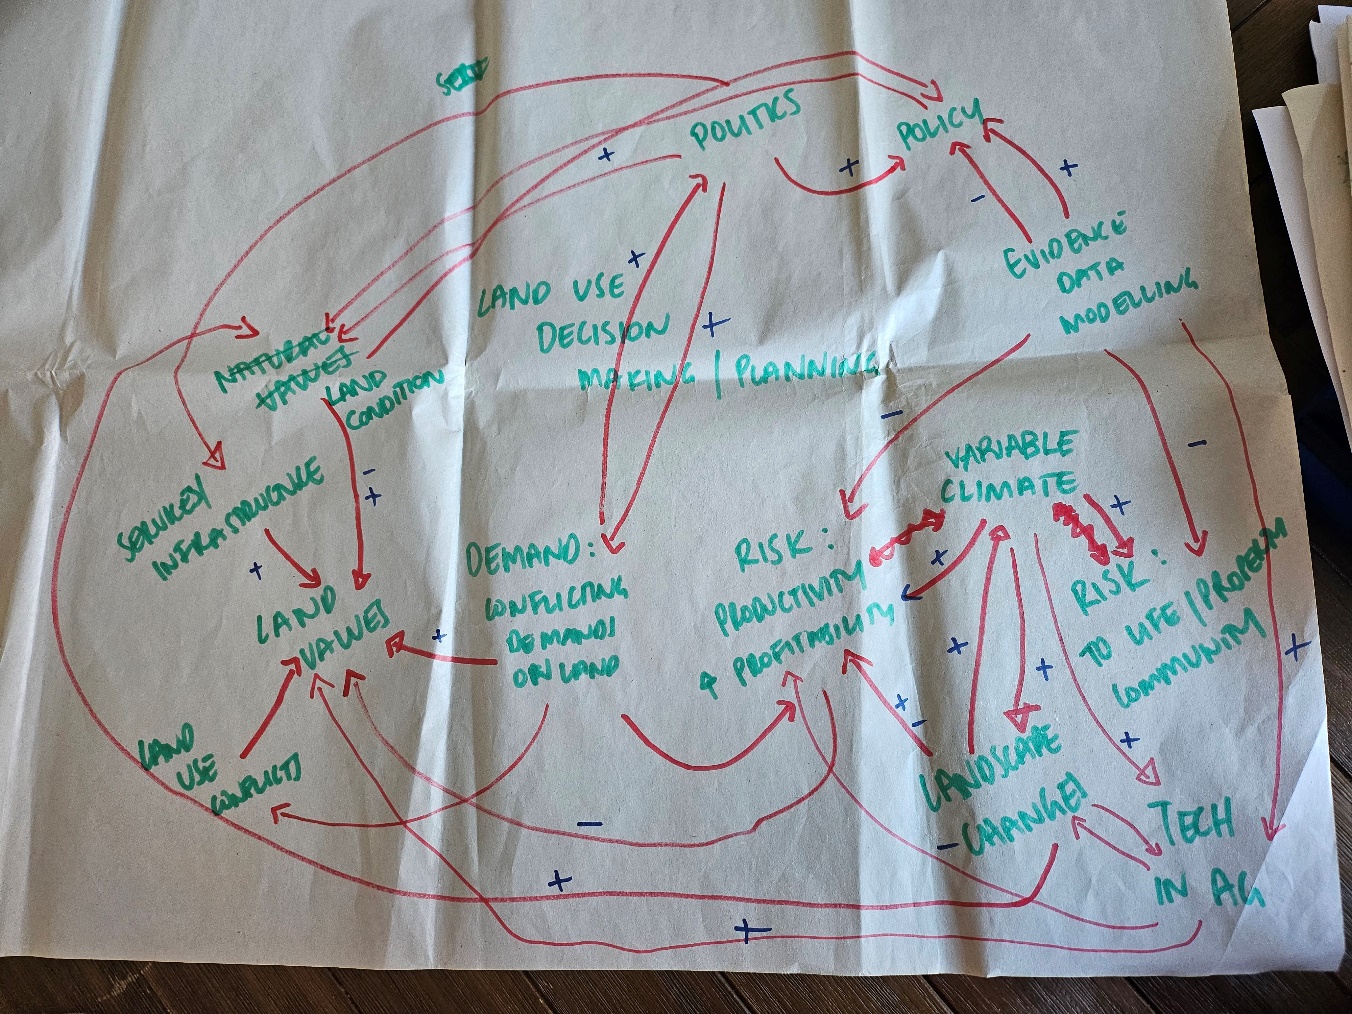


Figure 2: CLD 2 Workgroup 2


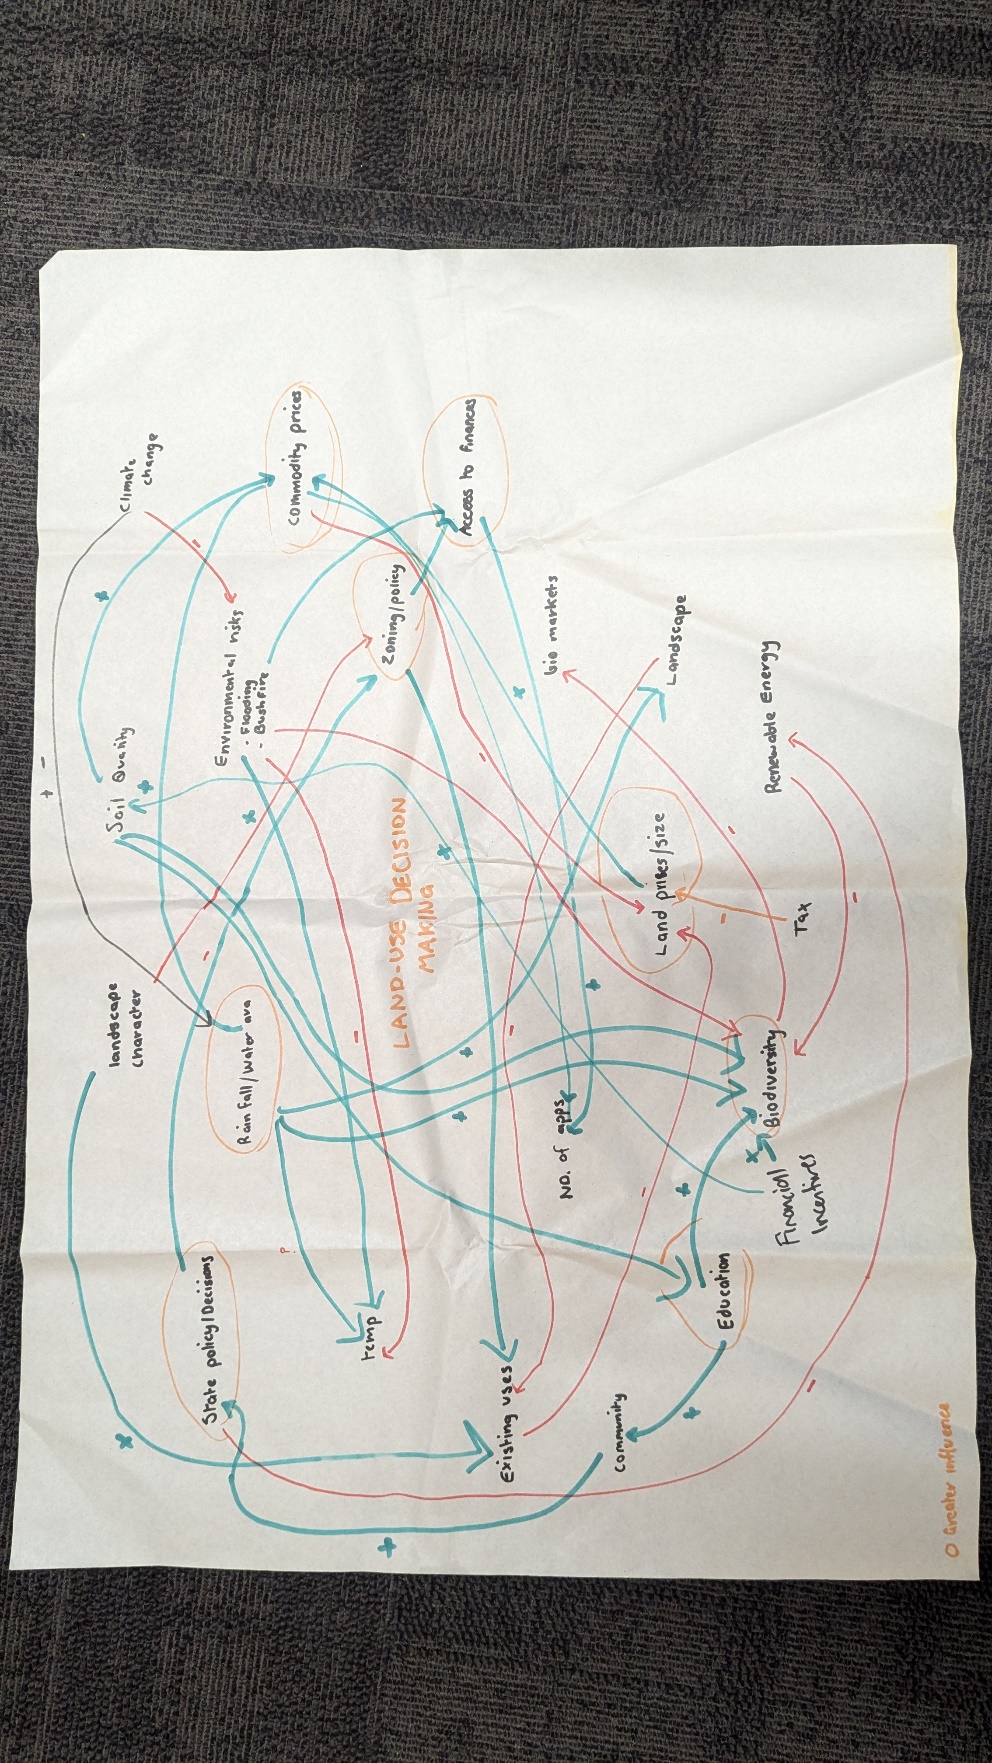


Figure 3: CLD 3 -Workgroup 3


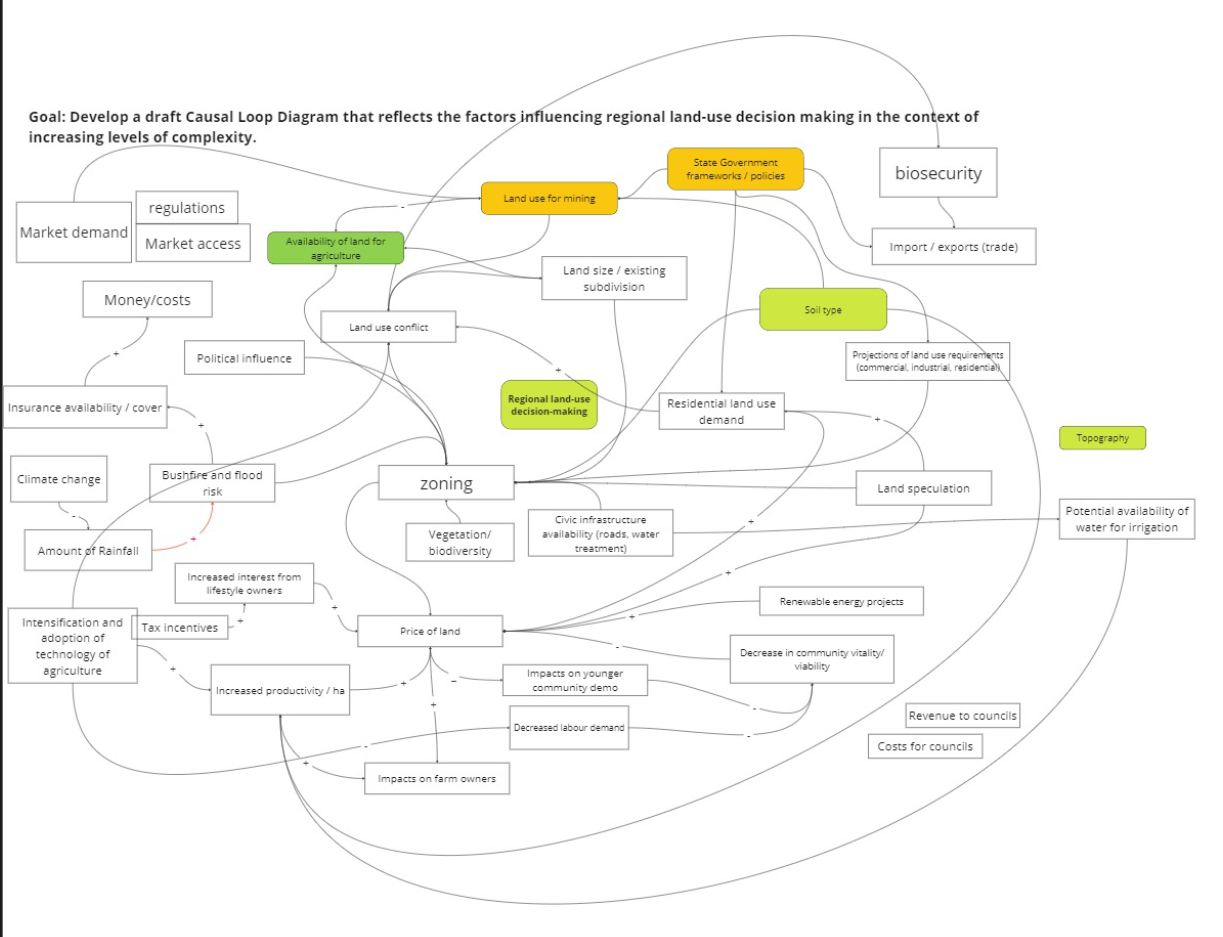


Figure 4: CLD 4 Workgroup 4 (Online)

**Digitised CLD identifying relevant loops**


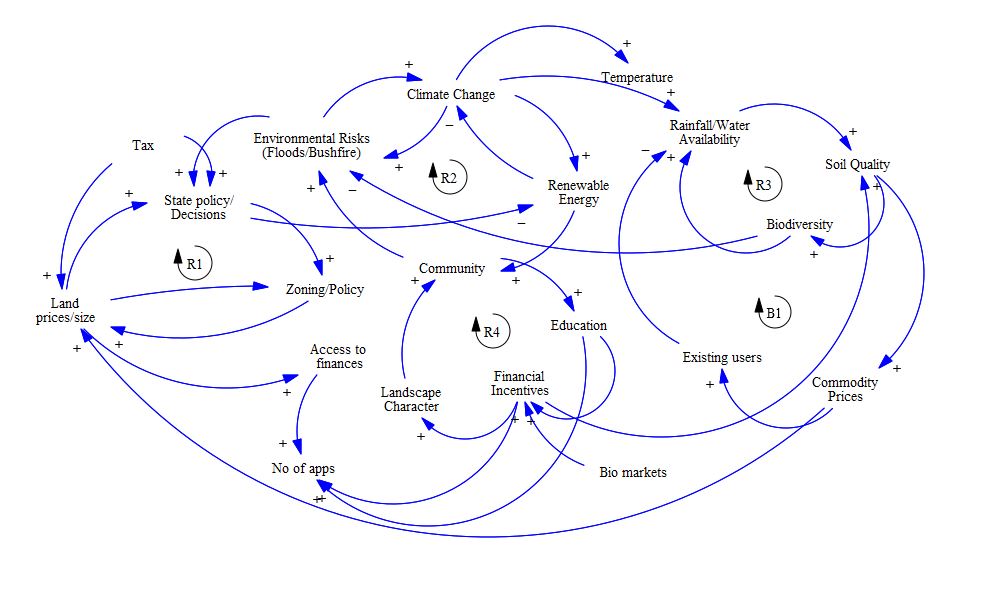


Figure 5: Digitised CLD 1


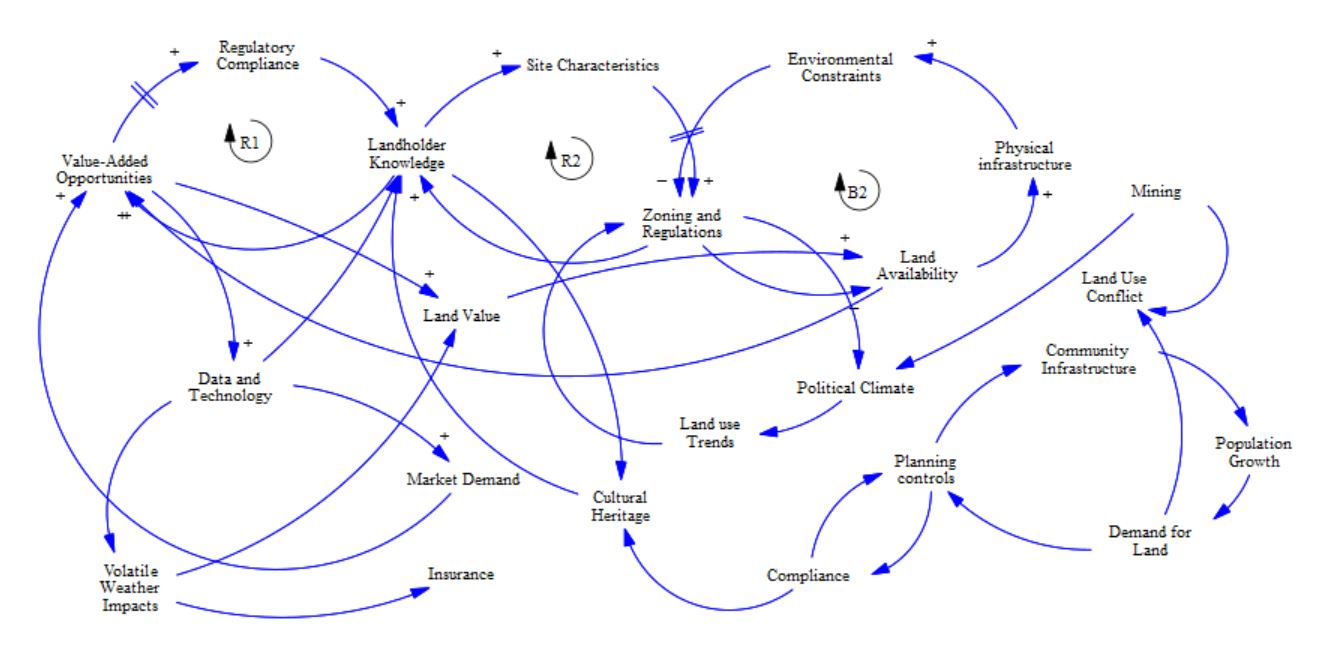


Figure 6: Digitised CLD 2


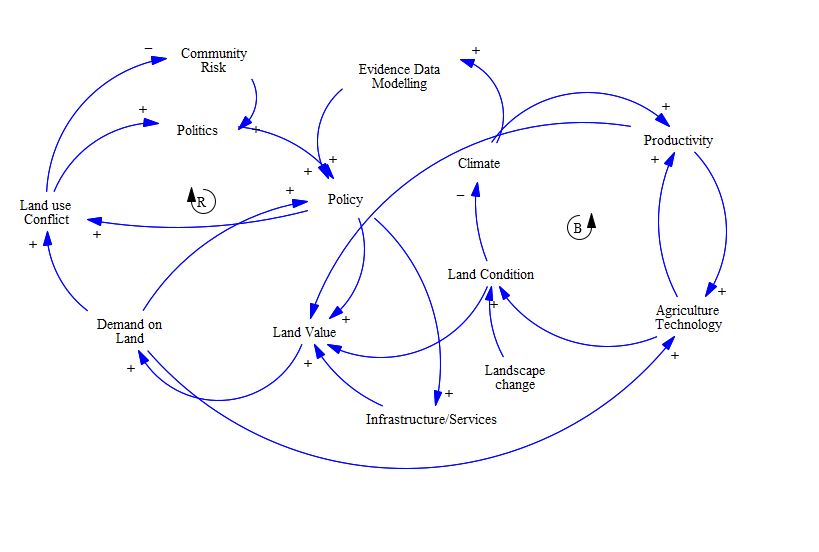


Figure 7: Digitised CLD 3


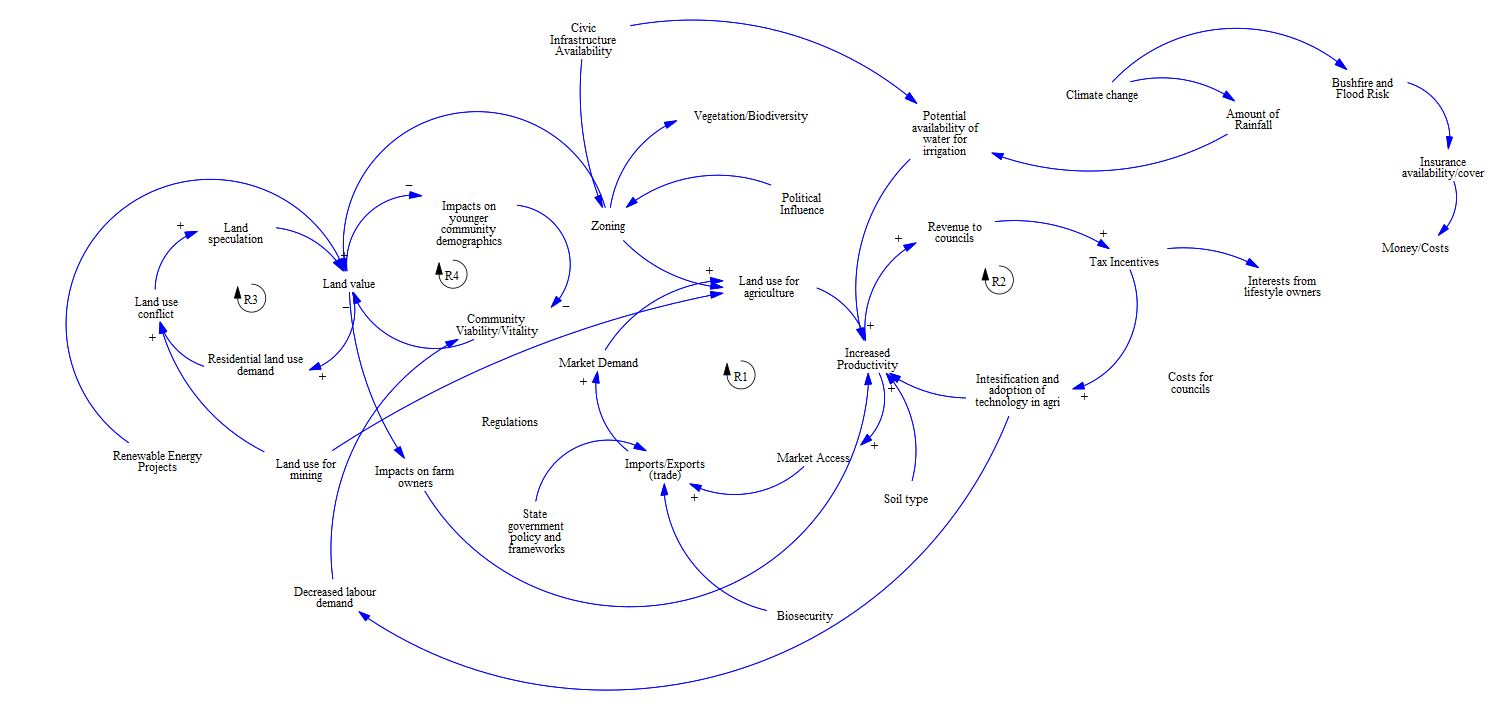


Figure 8: Digitised CLD 4
